# Supplementary material for: The Impact of a Product-Harm Crisis on Marketing Effectiveness
Source: Atypon-hosted journal article supplement (doi:10.1287/mksc.1060.0227), 2007-03-01
Supplement: mksc.1060.0227ec.doc [file mksc.1060.0227ec.doc]

**Technical Appendix MS # 5155.2**

## The Impact of a Product-Harm Crisis on Marketing Effectiveness

**Model Estimation**

The model is estimated by using the *filtering forward, backward sampling* algorithm (Carter and Kohn 1994, Frühwirth-Schnatter 1994). The *forward filtering* equations assume that *G*, *V*, and *Wt* are known, an assumption we shall relax shortly (West and Harrison 1999, p. 103-104)

1. Posterior at

(7)

1. Prior at *t*

(8) where and

1. One-step forecast

(9) where and

4. Posterior at *t*

(10) ,

where , is the realization of , and.

The *backward filtering* part samples the parameters, , as described by West and Harrison (1999, p. 570). We simulate the individual state vectors as follows:

(11) Sample from , then

(12) For each *t* = sample from p(|,), where the conditioning value of is the value just sampled. The required conditional distributions are:

, where and with .

As noted above, the process assumes that *l*, *V***,** *W* and ** are known. By using Gibbs sampling techniques (Gelman, Carlin, Stern and Rubin 1995), we can sample from each of these distributions:

1) *W*. We assume a time-constant diagonal state equation covariance matrix *W*. The diagonality assumption is not that restrictive, as it does not imply are independent – because we allow correlations via the equations for the brands. Rather, the assumption of diagonal *W* implies only conditional independence and thus *W* captures longitudinal rather than cross sectional variance. The prior on diagonal element *Wmb* (for brand *b*, independent variable *m*) is Inverse Gamma (, ). Then the full conditional distribution for *Wmb* is Inverse Gamma ~ , where is the row fromcorresponding to . We choose a diffuse prior for *W*: and.

2) *V***.** We allows for nonzero covariances between the errors of the brand ln sales equations. We specify the prior on the covariance matrix *V* is Inverse Wishart (, ). The full conditional distribution for *V* is Inverse Wishart ~ . We use a diffuse prior for *V*, with = *B* + 2 = 5 and.

3) *l*. We use the same prior specification for each element of **. Specifically, for brand *b*, independent variable *m* we assume a truncated normal prior: . The likelihood may be derived as follows. Note that, by rearranging (6) and stacking the observations for parameter across time in and in , we obtain , where is a scalar and is the diagonal element from *W* corresponding to. Then this yields the standard form for a regression with the likelihood. Given that the prior and likelihood are normal, the full conditional posterior distribution is given by

~ , i.e., we draw from a normal distribution truncated at zero. For we use a diffuse prior: = 0.50 and =100.

4) . For brand *b*, independent variable *m* we assume a normal prior:. We construct the likelihood as follows. Rearranging equation (6) yields where. This is a standard regression equation. Thus the likelihood for ~ . When combined with the normal prior, the full conditional posterior distribution is given as

~ . We use diffuse priors: =0, = 100.

Inferences

The model is estimated by sequentially running through the forward-filtering, backward sampling equations (7)-(12). Next we draw the parameters specified at 1)-4) above, and that completes one Gibbs draw. We generate 400,000 draws in total of which we use the first 200,000 draws for burn-in purposes; based on visual checks the chain converges already after approximately 10,000 draws. We use every 100th of the final 200,000 draws for inferences, since thinning the series of draws reduces autocorrelation (Gelman et al. 1995). Hence, the effective sample size is 2,000. A critical issue when applying MCMC estimation is to establish convergence of the parameter estimates (Rust and Verhoef 2005). To that extent, we used Raftery and Lewis’s (1996) test for MCMC convergence (implemented in the coda package in R; [http://www.r-project.org](http://www.r-project.org/)), which confirms that the burn-in and inference samples are sufficiently large (see van Heerde and Bijmolt 2005 for another application of this test in marketing).

##### Missing values

The DLM copes naturally with missing data. A missing brand in week *t* causes missing values in the dependent variables (vector *y*) and in the independent variable (matrix *F*). The corresponding rows are omitted from *y* and *F*, as are the corresponding rows and columns in matrix *V* (see also Van Heerde, Mela, and Manchanda 2004). The parameters associated with the missing brand are not updated in week *t*, which is achieved by equaling the posterior distribution to its prior. Specifically, for such parameters we use in equation (10) and (West and Harrison 1999, p. 351).

References

Carter, C.K. and R Kohn (1994), "On Gibbs Sampling for State Space Models," *Biometrika*, 81 (3), 541-53.

Frühwirth-Schnatter, S. (1994), “Data Augmentation and Dynamic Linear Models,” *Journal of Time Series Analysis*, 15 (2), 183-202.

Gelman, A., J.B. Carlin, H.S. Stern, and D.B. Rubin (1995), *Bayesian Data Analysis*, New York: Chapman and Hall.

Raftery, Adrian E. and Steven M. Lewis (1996), “Implementing MCMC,” in *Markov Chain Monte Carlo in Practice*, W.R. Gilks, S. Richardson, and D.J. Spiegelhalter, eds. London: Chapman and Hall.

Rust, R.T. and P.C. Verhoef (2005), “Optimizing the Marketing Interventions Mix in Intermediate-Term CRM,” *Marketing Science*, 24 (3) 477-489.

Van Heerde, H.J. and T.H.A. Bijmolt (2005), “Decomposing the Promotional Revenue Bump for Loyalty Program Members Versus Non-Members,” *Journal of Marketing Research*, 42 (November), 443-457.

West, M. and J. Harrison (1999), *Bayesian Forecasting and Dynamic Models.* Second Edition. New York: Springer.
